# Supplementary material
Source: publisher figshare collection journal article supplement (https://frontiersin.figshare.com/ndownloader/files/14250884)
Supplement: Supplementary file 1 [file 14250884]

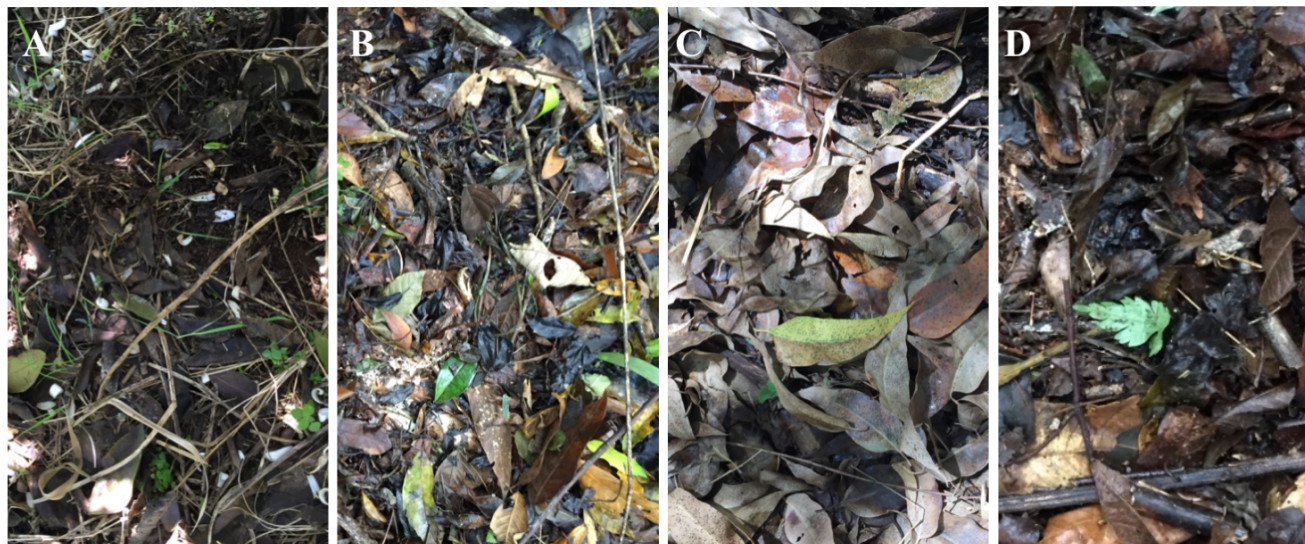

**Supplementary Figure 1.** Figures from the plant residue layer in each site of study. (A) Citrus; (B) Forest 1; (C) Eucalyptus; and (D) Forest 2.
